# Supplementary material
Source: PubMed Central journal article supplement (PMC7965486)
Supplement: 2961_table.pdf [file 2961_table.pdf]

**On-line Table 1: Clinical and angiographic data of 11 patients with bifurcation aneurysms treated with kissing-Y or crossing-Y stent-assisted coiling**

| Classification                | Anterior Circulation (Nos. 1–6) |          |          |          |          |                    | Posterior Circulation (Nos. 7–11) |          |          |                  |          |
|-------------------------------|---------------------------------|----------|----------|----------|----------|--------------------|-----------------------------------|----------|----------|------------------|----------|
|                               | 1                               | 2        | 3        | 4        | 5        | 6                  | 7                                 | 8        | 9        | 10               | 11       |
| Case and No.                  |                                 |          |          |          |          |                    |                                   |          |          |                  |          |
| Age (yr)/sex                  | 58/M                            | 42/F     | 73/M     | 64/M     | 52/M     | 53/F               | 56/F                              | 53/F     | 78/F     | 67/F             | 68/F     |
| Presentation                  | SAH                             | Dizz     | Dizz     | SAH      | Ha       | SAH                | Inc                               | Inc      | SAH      | Ha               | Inc      |
| HH scale                      | 2                               | 0        | 0        | 2        | 0        | 2                  | 0                                 | 0        | 2        | 0                | 0        |
| Bifurcation site              | AcomA                           | AcomA    | MCA-Bif  | MCA-Bif  | MCA-Bif  | PcomA-fetal<br>PCA | BA-Bif                            | BA-Bif   | BA-Bif   | BA-Bif           | BA-Bif   |
| Wide-neck                     | Yes                             | Yes      | Yes      | Yes      | Yes      | Yes                | Yes                               | Yes      | Yes      | Yes              | Yes      |
| Size                          | Small                           | Small    | Small    | Small    | Small    | Small              | Small                             | Small    | Small    | Large            | Small    |
| Stent strategy                | Planned                         | Non-P    | Non-P    | Non-P    | Non-P    | Non-P              | Non-P                             | Planned  | Planned  | Planned          | Planned  |
| Y-Stent                       | Crossing                        | Crossing | Crossing | Crossing | Crossing | Crossing           | Crossing                          | Crossing | Crossing | Kissing          | Kissing  |
| 1st Stent                     | EP                              | EP       | NF       | NF       | EP       | EP                 | EP                                | EP       | EP       | NF               | EP       |
|                               | 4.5/22                          | 4.5/22   | 4.5/15   | 2.5/15   | 4.5/22   | 4.5/22             | 4.5/28                            | 4.5/28   | 4.5/28   | 3.5/30           | 4.5/28   |
| 2nd Stent                     | EP                              | EP       | NF       | NF       | EP       | EP                 | EP                                | EP       | EP       | EP               | EP       |
|                               | 4.5/14                          | 4.5/22   | 4.5/15   | 2.5/15   | 4.5/22   | 4.5/22             | 4.5/28                            | 4.5/22   | 4.5/22   | 4.5/28           | 4.5/28   |
| Catheterization difficulty    | No                              | No       | Yes      | Yes      | No       | No                 | No                                | No       | No       | Yes              | Yes      |
| Complications                 | No                              | Thrombus | No       | No       | No       | No                 | No                                | No       | No       | No               | No       |
| Initial results               | Class I                         | Class I  | Class II | Class II | Class II | Class I            | Class I                           | Class I  | Class I  | Class III        | Class II |
| mRS/discharge                 | 1                               | 1        | 0        | 1        | 0        | 1                  | 1                                 | 0        | 1        | 0                | 0        |
| Angiographic FU interval (mo) | 6                               | 6        | 11       | 15       | 6        | 8                  | 12                                | 7        | 7        | 24               | 7        |
| Results                       | Cured                           | Cured    | Cured    | Cured    | Cured    | Cured              | Cured                             | Cured    | Cured    | Rec <sup>a</sup> | Stable   |
| Retreatment                   | 0                               | 0        | 0        | 0        | 0        | 0                  | 0                                 | 0        | 0        | 1                | 0        |
| Clinical FU                   |                                 |          |          |          |          |                    |                                   |          |          |                  |          |
| Interval (mo)                 | 6                               | 6        | 18       | 28       | 10       | 13                 | 12                                | 7        | 7        | 24               | 20       |
| mRS/follow-up                 | 1                               | 1        | 0        | 1        | 0        | 1                  | 1                                 | 0        | 1        | 0                | 0        |

**Note:**—Dizz indicates dizziness; Inc, incidental; Ha, headache; Non-P, non-planned (salvaging); EP, Enterprise; NF, Neuroform; Rec, recanalization; FU, follow-up; HH scale, Hunt and Hess scale.

<sup>a</sup>Recanalization for coil compaction and retreatment once a complete occlusion was obtained.
